# Supplementary material for: Krüppel-like factor 7 attenuates hippocampal neuronal injury after traumatic brain injury
Source: PubMed Central journal article supplement — Neural Regen Res. 2021 Aug 4;17(3):661–72. doi: 10.4103/1673-5374.320991 (PMC8504401; doi:10.4103/1673-5374.320991), 2021-08-04
Supplement: NRR-17-661_Suppl1.pdf [file NRR-17-661_Suppl1.pdf]

## OPEN PEER REVIEW REPORT 1

**Name of journal:** Neural Regeneration Research

**Manuscript NO:** NRR-D-20-01101

**Title:** KLF7 attenuates neuronal injury by promoting JAK2/STAT3 signaling in a model of traumatic brain injury

**Reviewer's Name:** Hanin Abdel-Haq

**Reviewer's country:** Italy

### COMMENTS TO AUTHORS

This research study demonstrated the participation of the transcription factor KLF7 through the activation of the JAK2/STAT3 signaling, in the rescue of the hippocampal neurons after traumatic brain injury (TBI), in vitro and in vivo.

This article worth publication, however, it needs major revisions.

The introduction needs, in general, to be rewritten in a clearer manner:

- For example, lines 29 - 37 and lines 52 - 60- (page 4) are not well written, and therefore they need to be adjusted.
- Which tissues predominantly express the KLF transcription factors?
- Please, introduce the JAK-STAT pathway (give some information).

Results:

- Please, give some information about the functional role of  $\beta$ -III-tubulin in relation to the KLF7, to explain why you used it as evidence in the relative experiment.
- Please, identify DAPI, PI, DG, CTS.
- Please, add the number of the replicates, and number of the animals, for each experiment, in the respective legends.
- NS in the figure 1 legend is relevant?
- Please, explain in the legend what do figures 3A and D show.
- For the result number 4, please add at the end of the result (Fig. 4 A - I) because it lacks.
- For the result number 9, you wrote "we performed a single BrdU injection to three groups 2 h before the perfusion" but, which perfusion? Please write this result in a clear manner.
- In page 14 lines 10 and 23, what do you mean by "phenotypes".
- In page 15, lines 21 - 28 are not clear.
- Page 20 line 39, please, add an appropriate reference after "immunolabeling was performed based on previously described methods".
